# Supplementary material for: The Effect of Fibrous Reinforcement on the Polycondensation Degree of Slag-Based Alkali Activated Composites
Source: MDPI journal article supplement (doi:10.3390/polym13162664), 2021-08-10
Supplement: s1 [file s1]

## Supplementary materials

# The Effect of Fibrous Reinforcement on the Polycondensation Degree of Slag-Based Alkali Activated Composites

Isabella Lancellotti<sup>1,\*</sup>, Federica Piccolo <sup>1</sup>, Hoang Nguyen<sup>2</sup>, Mohammad Mastali<sup>2</sup>, Mohammad Alzeer<sup>2</sup>, Mirja Illikainen<sup>2</sup>, Cristina Leonelli<sup>1</sup>

Table S1. Metakaolin and metakaolin geopolymers behaviour in HCl (1:20 by weight) .

|                    | Metakaolin | geoMK 28 days | geoMK 180days |
|--------------------|------------|---------------|---------------|
| Soluble fraction   | 23.74%     | 64.44%        | 65.8%         |
| Insoluble fraction | 76.26%     | 35.56%        | 34.2%         |

Table S2. metakaolin behaviour in NaOH solution.

| SAMPLE (µg/ml) | Al  | Si  | Fe  | Si/Al |
|----------------|-----|-----|-----|-------|
| Metakaolin     | 144 | 194 | 2,9 | 1,347 |
